# Supplementary material for: Local structure of the metal–organic perovskite dimethylammonium manganese(ii) formate
Source: Royal Society of Chemistry journal article supplement (doi:10.1039/c5dt03687a), 2016-01-01
Supplement: c5dt03687a1.pdf [file c5dt03687a1.pdf]

## **Local structure of the metal-organic perovskite dimethylammonium manganese(II) formate**

H. D. Duncan, M. T. Dove, D. A. Keen, and A. E. Phillips

### **Electronic Supplementary Information**

#### **Contents**

|          |                                            |            |
|----------|--------------------------------------------|------------|
| <b>1</b> | <b>Data collection run numbers</b>         | <b>S2</b>  |
| <b>2</b> | <b>Restraints applied to refinements</b>   | <b>S3</b>  |
| <b>3</b> | <b>Lattice parameters</b>                  | <b>S5</b>  |
| <b>4</b> | <b>Convergence criteria</b>                | <b>S6</b>  |
| <b>5</b> | <b>Sample configurations</b>               | <b>S7</b>  |
| <b>6</b> | <b>Partial pair distribution functions</b> | <b>S8</b>  |
| <b>7</b> | <b>Progress of refinements</b>             | <b>S11</b> |
| <b>8</b> | <b>Representative fits</b>                 | <b>S12</b> |
| <b>9</b> | <b>O–Mn–O bond angles</b>                  | <b>S13</b> |

# 1 Data collection run numbers

The raw data from this experiment are stored in the ISIS archive, experiment number 1210310, available at <https://data.isis.stfc.ac.uk>, with run numbers given in Table S1.

For the nominal 190 K measurement, the measured sample temperature is close to that of the phase transition at 183 K. Nonetheless the Bragg profile for the 190K sample shows no peak at  $d$ -spacing 6.90 Å, which would be expected if the low-temperature phase were accidentally present.

**Table S1:** Collection run numbers for long data sets  $> 150\mu\text{Ah}$  for  $\text{DMMnF}$ , values in brackets are maximum ranges, i.e. 243.1(6)K is  $243.1 \pm 0.3$  K. \*range for run GEM60024 = 247 K to 242.6 K

| $T_{\text{nominal}}/\text{K}$ | $T_{\text{CCR}}/\text{K}$ | $T_{\text{sample}}/\text{K}$ | Run numbers       | Total proton beam charge / $\mu\text{Ah}$ |
|-------------------------------|---------------------------|------------------------------|-------------------|-------------------------------------------|
| 293                           | –                         | 300.9(5)                     | GEM60010–GEM60018 | 1288                                      |
| 250                           | 250                       | 243.1(6)*                    | GEM60024–GEM60031 | 1200                                      |
| 225                           | 225                       | 218.3(1)                     | GEM60133–GEM60136 | 508                                       |
| 200                           | 200                       | 194.2(1)                     | GEM60037–GEM60044 | 1200                                      |
| 190                           | 190                       | 184.5(5)                     | GEM60050          | 150                                       |
| 180                           | 180                       | 175.0(5)                     | GEM60056          | 150                                       |
| 170                           | 170                       | 165.5(5)                     | GEM60062          | 150                                       |
| 160                           | 160                       | 155.4(3)                     | GEM60068          | 150                                       |
| 150                           | 150                       | 145.6(1)                     | GEM60074–GEM60081 | 1200                                      |
| 100                           | 100                       | 97.4(1)                      | GEM60087–GEM60094 | 1200                                      |
| 20                            | 20.2(1)                   | 21.5(1)                      | GEM60100–GEM60106 | 1050                                      |
| 7                             | 4.75(3)                   | 6.81(3)                      | GEM60117–GEM60122 | 900                                       |

The run numbers for background and normalisation measurements are given in Table S2.

**Table S2:** Run numbers required for normalisation and background corrections

| Description              | Run number        | Description        | Total proton beam charge / $\mu\text{Ah}$ |
|--------------------------|-------------------|--------------------|-------------------------------------------|
| Normalisation            | GEM60002          | 8mm V rod          | 500                                       |
| Normalisation background | GEM60003          | Empty GEM          | 150                                       |
| Sample background        | GEM60004          | Empty CCR          | 200                                       |
| Container                | GEM60005–GEM60008 | Empty vanadium can | 600                                       |

## 2 Restraints applied to refinements

The restraints applied during Rietveld and RMC refinements are listed in tables S3, S4, and S5 below:

**Table S3:** Bond types and restraints applied to them during GSAS refinement.

| Bond type      | Restraint length /Å |
|----------------|---------------------|
| C–D (DMA)      | 1.050               |
| C–D (formate)  | 1.050               |
| N–D            | 1.050               |
| Mn–O           | 2.180               |
| C=O (formate)* | 1.250               |

\* applied to the low-temperature phase only

**Table S4:** Morse bond stretch potentials used to constrain RMC refinement, according to the penalty term  $E = D(1 - \exp\{-\alpha(r - r_0)\})^2$ . We set  $\alpha = 2.55 \text{ Å}^{-1}$  throughout, in accordance with the MM3 potential set.

| Atomic pair | $D/\text{eV}$ | $r_0/\text{Å}$ |
|-------------|---------------|----------------|
| C–N         | 2.051         | 1.50           |
| C=O         | 3.376         | 1.24           |
| C–D         | 2.275         | 1.06           |
| N–D         | 2.947         | 1.06           |

**Table S5:** Angle potentials used to constrain RMC refinement, according to the penalty term  $E = \frac{1}{2}k(\cos \theta - \cos \theta_0)^2$ .

| Atoms | $k/\text{eV}$ | $\theta_0/^\circ$ |
|-------|---------------|-------------------|
| O=C=O | 17.876        | 129.800           |
| C–N–C | 7.864         | 108.600           |
| D–C–D | 8.976         | 107.114           |
| C–N–D | 7.602         | 106.376           |
| D–C–O | 7.403         | 114.900           |
| N–C–D | 11.235        | 104.700           |
| C–N–D | 6.504         | 105.949           |

**Table S6:** Distance windows applied to RMC refinements

| <i>T</i> /K | D–C             | D–N             | C–O             | C–N             | O–Mn            |
|-------------|-----------------|-----------------|-----------------|-----------------|-----------------|
| 293         | 0.9091 - 1.1288 | 0.9482 - 1.1726 | 1.1179 - 1.3783 | 1.3311 - 1.6420 | 2.0751 - 2.3625 |
| 250         | 0.9207 - 1.1403 | 0.9484 - 1.1732 | 1.1161 - 1.3761 | 1.3261 - 1.6361 | 2.0713 - 2.3582 |
| 200         | 0.9478 - 1.1713 | 0.9485 - 1.1736 | 1.1152 - 1.3750 | 1.3229 - 1.6326 | 2.0693 - 2.3560 |
| 150         | 0.9229 - 1.2262 | 0.9310 - 1.2100 | 1.1431 - 1.3483 | 1.3657 - 1.7030 | 2.0156 - 2.3755 |
| 100         | 0.9268 - 1.2436 | 0.9300 - 1.2174 | 1.1632 - 1.3570 | 1.3606 - 1.7179 | 2.0206 - 2.3184 |
| 20          | 0.9290 - 1.2640 | 0.9338 - 1.2340 | 1.1638 - 1.3642 | 1.3682 - 1.7350 | 2.0312 - 2.3154 |
| 7           | 0.9257 - 1.2446 | 0.9272 - 1.2256 | 1.1637 - 1.3762 | 1.3677 - 1.7227 | 1.9984 - 2.3529 |

### 3 Lattice parameters

The lattice parameters for the high and low temperature phases obtained from Rietveld refinement, expressed in terms of the monoclinic  $Cc$  cell, are given in Table S7 below:

**Table S7:** Lattice parameters in terms of the  $Cc$  cell

| $T_{\text{nominal}}/\text{K}$ | $T_{\text{sample}}/\text{K}$ | $a/\text{\AA}$ | $b/\text{\AA}$ | $c/\text{\AA}$ | $\beta/^\circ$ |
|-------------------------------|------------------------------|----------------|----------------|----------------|----------------|
| 293                           | 300.9(5)                     | 14.4347(4)     | 8.3339(2)      | 9.0141(3)      | 122.261(9)     |
| 250                           | 243.1(6)                     | 14.4314(4)     | 8.3332(2)      | 8.8907(3)      | 122.388(9)     |
| 225                           | 218.3(1)                     | 14.4351(4)     | 8.3341(2)      | 8.9722(3)      | 122.431(9)     |
| 200                           | 194.2(1)                     | 14.4316(4)     | 8.3321(2)      | 8.9612(3)      | 122.467(9)     |
| 190                           | 184.5(5)                     | 14.4340(4)     | 8.3335(2)      | 8.9602(3)      | 122.478(9)     |
| 180                           | 175.0(5)                     | 14.3746(3)     | 8.3208(2)      | 8.8852(2)      | 120.831(1)     |
| 170                           | 165.5(5)                     | 14.3707(3)     | 8.3207(2)      | 8.8815(2)      | 120.810(1)     |
| 160                           | 155.4(3)                     | 14.3675(3)     | 8.3209(2)      | 8.8778(2)      | 120.798(1)     |
| 150                           | 145.6(1)                     | 14.3628(3)     | 8.3214(2)      | 8.8734(1)      | 120.784(1)     |
| 100                           | 97.4(1)                      | 14.3530(3)     | 8.3214(2)      | 8.8582(2)      | 120.781(1)     |
| 20                            | 21.5(1)                      | 14.3477(3)     | 8.3231(2)      | 8.8454(2)      | 120.802(1)     |
| 7                             | 6.81(3)                      | 14.3460(4)     | 8.3222(2)      | 8.8446(2)      | 120.799(2)     |

The lattice parameters for the high temperature phase obtained from Rietveld refinement, expressed in terms of the original  $R\bar{3}c$  cell, are given in Table S8 below:

**Table S8:** Lattice parameters in terms of the  $R\bar{3}c$  cell where  $a = b$  and  $\alpha = \beta = 90^\circ$ ,  $\gamma = 120^\circ$

| $T_{\text{nominal}}/\text{K}$ | $T_{\text{sample}}/\text{K}$ | $a/\text{\AA}$ | $c/\text{\AA}$ |
|-------------------------------|------------------------------|----------------|----------------|
| 293                           | 300.9(5)                     | 8.3340(3)      | 22.868(1)      |
| 250                           | 243(3)                       | 8.3320(3)      | 22.751(1)      |
| 225                           | 218.3(1)                     | 8.3341(3)      | 22.718(1)      |
| 200                           | 194.2(1)                     | 8.3321(3)      | 22.682(1)      |
| 190                           | 184.5(5)                     | 8.3335(3)      | 22.676(1)      |

## 4 Convergence criteria

Representative convergence plots for the three data sets models were refined against are given in Figure S1 below. RMC was run for four days for each configuration, corresponding to approximately  $1.5 \times 10^7$  atomic moves in the high-temperature phase and  $1.8 \times 10^7$  atomic moves in the low-temperature phase.

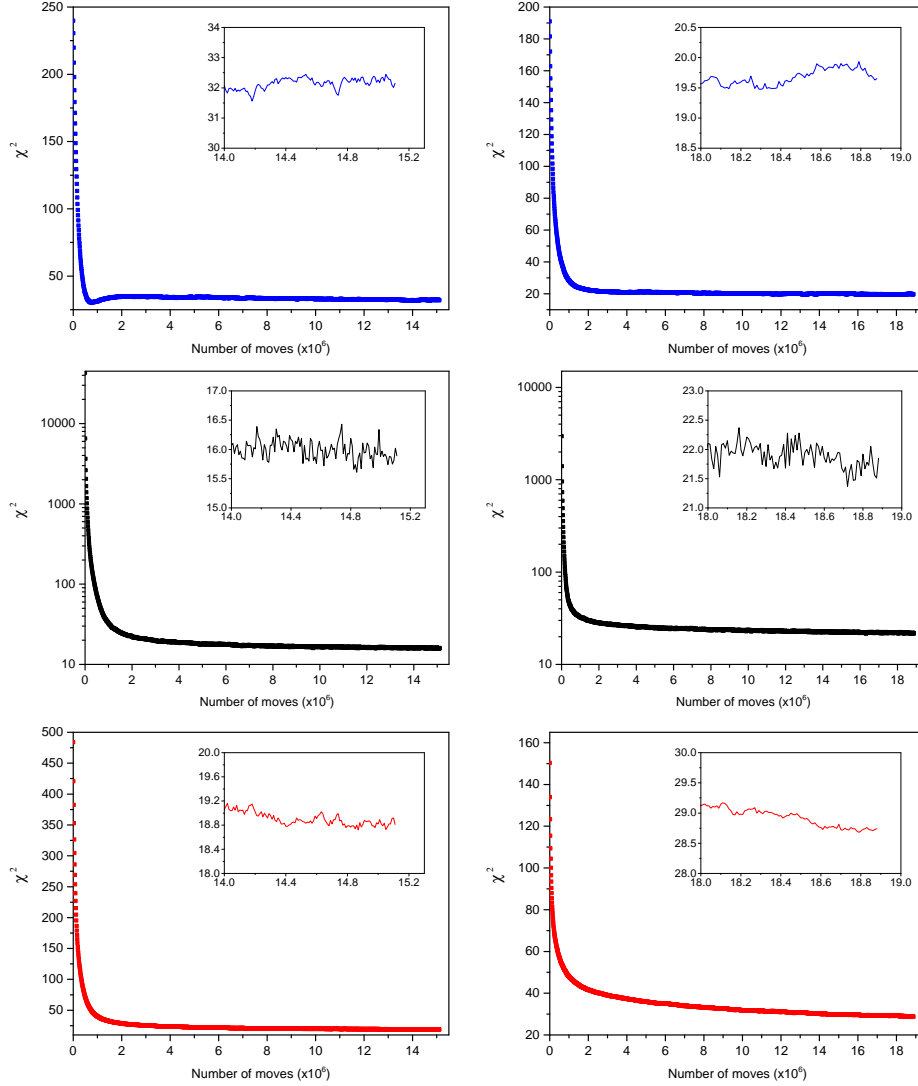

**Figure S1:** Representative  $\chi^2$  plotted as a function of the number of atomic moves made for the Bragg  $I(t)$  (top), PDF  $D(r)$  (middle), and scattering function  $F(Q)$  (bottom) fits to 298 K (left) and 150 K (right) data.

## 5 Sample configurations

Representative initial configurations of DMMnF in both phases are shown in Figure S2 below:

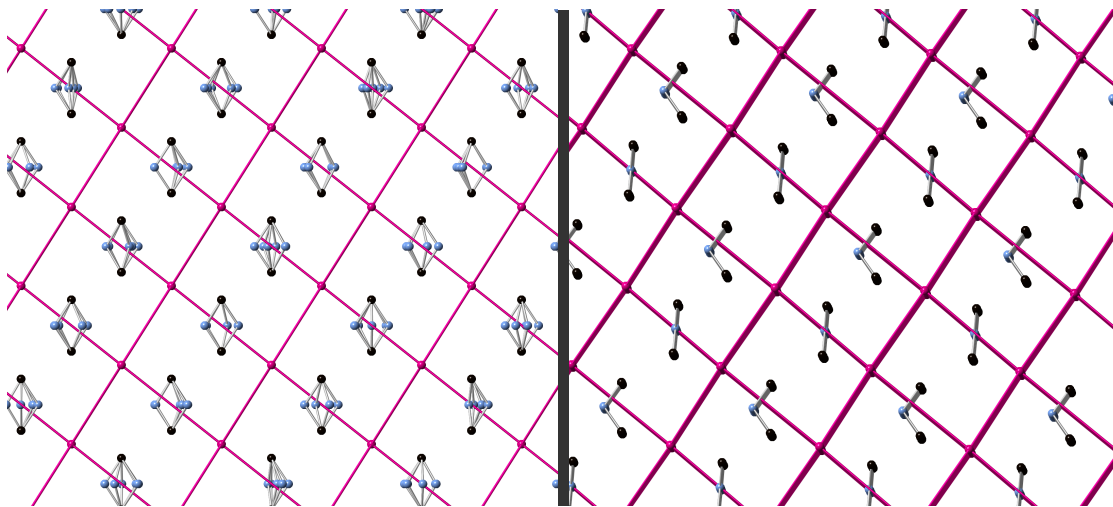

**Figure S2:** The initial configurations for a high (left) and low temperature (right) refinement with the  $\text{Mn}(\text{HCO}_2)_3$  framework is displayed as pink lines, and the deuterium atoms omitted for clarity. In the high temperature configuration (model 1), the  $\text{ND}_2$  groups (blue nitrogen shown) are rotated randomly about the  $\text{C}\cdots\text{C}$  axis. In the low temperature phase the DMA cations are not rotated from their crystal structure.

## 6 Partial pair distribution functions

The partial pair distribution functions, averaged over 30 refined configurations starting from configuration **1**, for bonding pairs are given in Figure S3 below. All bonds appear physically reasonable apart from Mn–O, in which both sides of the peak are sharper than expected. This is due to the distance window applied to prevent Mn–O pairs from moving outside an allowed range of separations. Increasing the size of the allowed window results in the Mn–O pair density expanding to fill the new window so that the new peak edges remain unphysically sharp. This implies that the data are comparatively unsensitive to the exact length of this bond. Indeed, considering the neutron scattering lengths of the relevant nuclei (see main text) shows that the Mn–O peak in the PDF is of only moderate intensity and negative; moreover, it is in the same region as several strong positive peaks, in particular intramolecular D···N and D···C distances from the DMA ion.

The distance windows for our final analysis were chosen to allow reasonable distances either side of the Rietveld refined values. The exact distance window values, though, did not affect our conclusions.

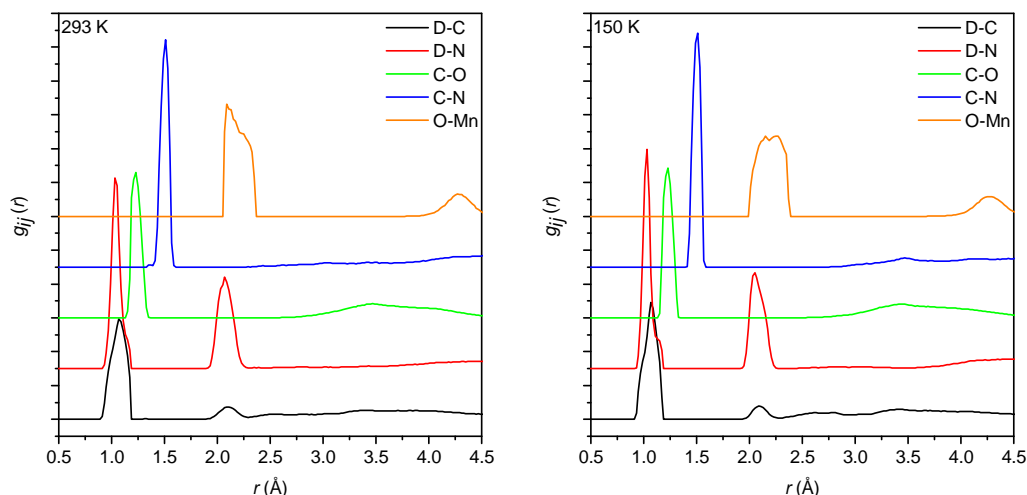

**Figure S3:** Partial PDFs for bonding pairs averaged over 30 individual configurations at 293 K (left) and 150 K (right).

In figures S4 and S5 below, we compare the residual PDF  $D_{\text{exp}}(r) - D_{\text{model}}(r)$  to the partial PDFs over the crucial region between 2 Å and 3.5 Å. In particular, the residual is greater than  $g_{\text{NO}}(r)$  in the high-temperature phase, but less in the low-temperature phase. This should not be taken, however, to mean that the distribution of N···O distances cannot be determined in the high-temperature phase: see discussion in main text.



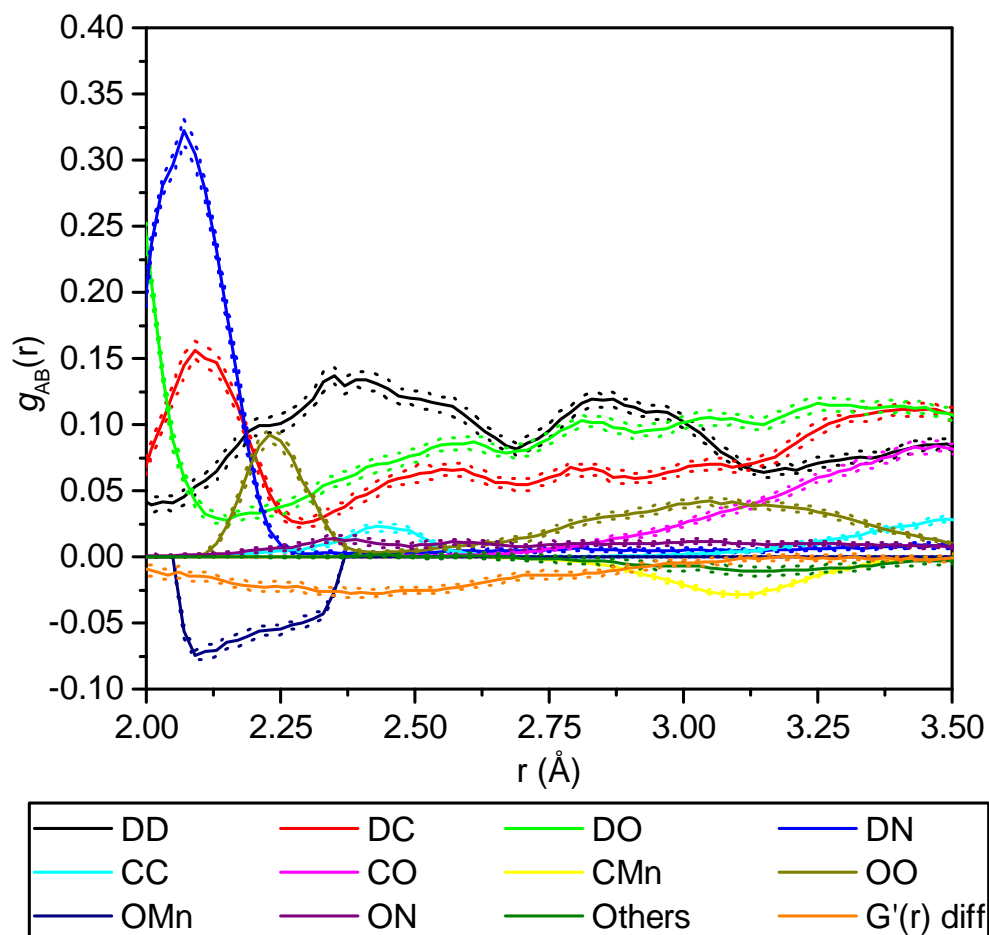

**Figure S4:** Scaled partial pair distribution functions contributing significantly to  $D(r)$  between 2 Å and 3.5 Å, along with the residual between the experimental and modelled PDF. All partial PDFs not explicitly shown are summed as “Others”. Dotted lines show  $\pm\sigma$  from 30 runs refining model 1 against the 293 K data.

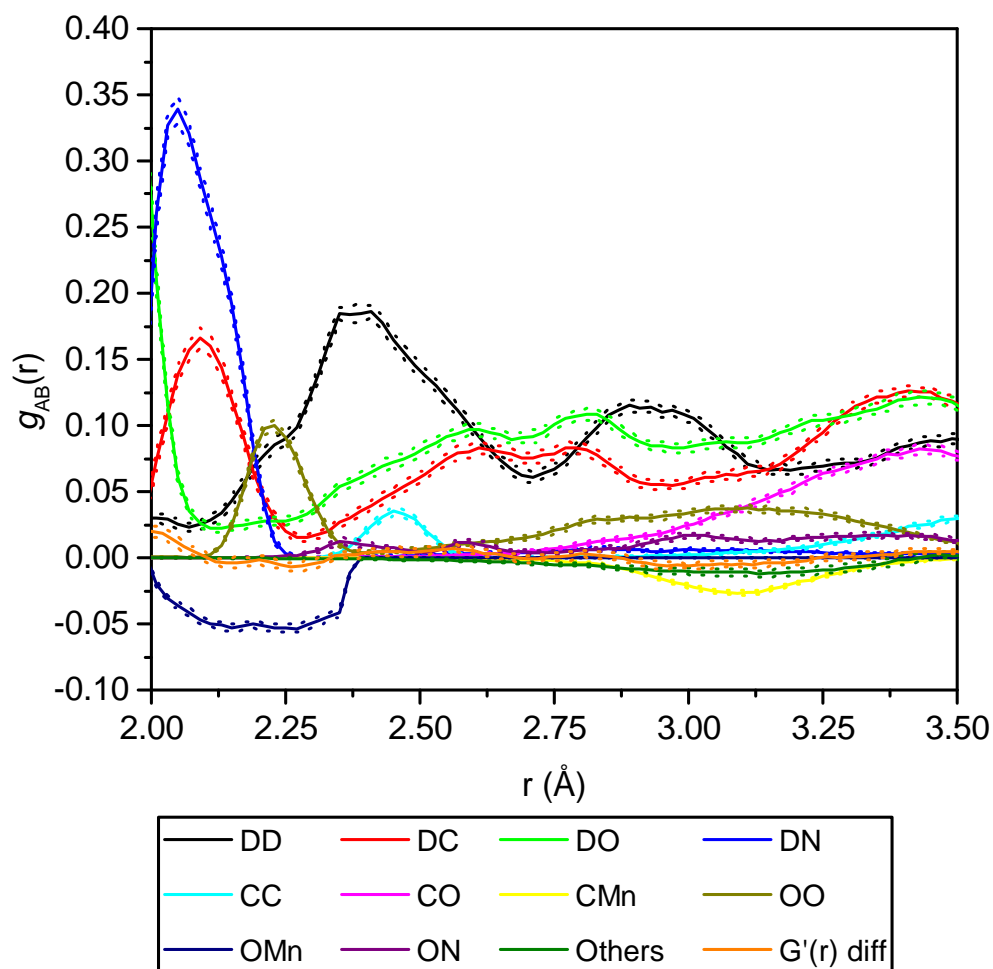

**Figure S5:** Scaled partial pair distribution functions contributing significantly to  $D(r)$  between 2 Å and 3.5 Å, along with the residual between the experimental and modelled PDF. All partial PDFs not explicitly shown are summed as “Others”. Dotted lines show  $\pm\sigma$  from 30 runs refining against the 150 K data.

## 7 Progress of refinements

Figure S6 below shows the evolution of the fits to the experimental data over the first twelve hours of refinement.

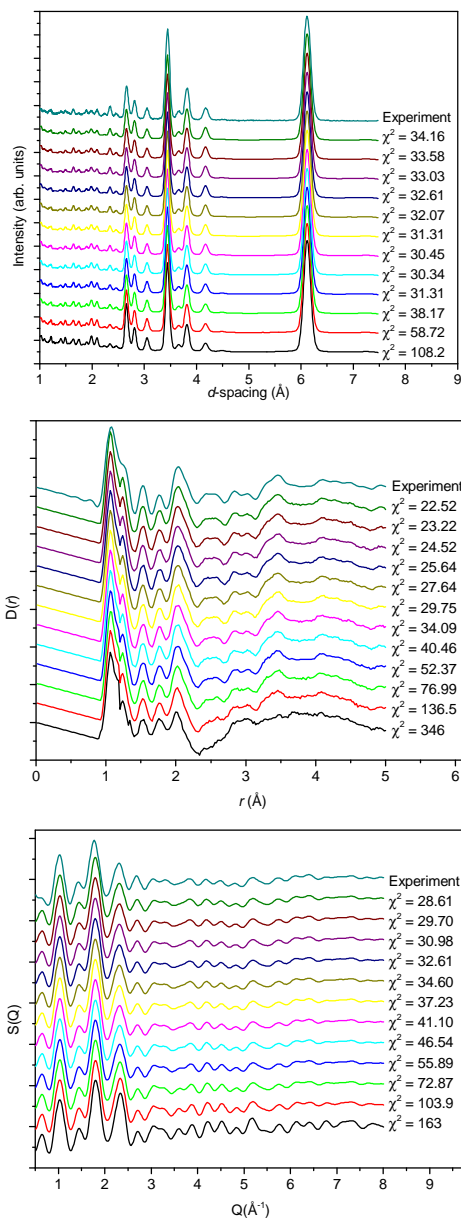

**Figure S6:** Evolution of the fits to the experimental data. Data (reading from bottom to top) were extracted each hour.

## 8 Representative fits

Representative fits to the  $D(r)$ ,  $I(t)$ , and  $F(Q)$  functions for the high-temperature phase are shown in Figure 6 of the main paper; the corresponding figure for the low-temperature phase is shown in Figure S7 below:

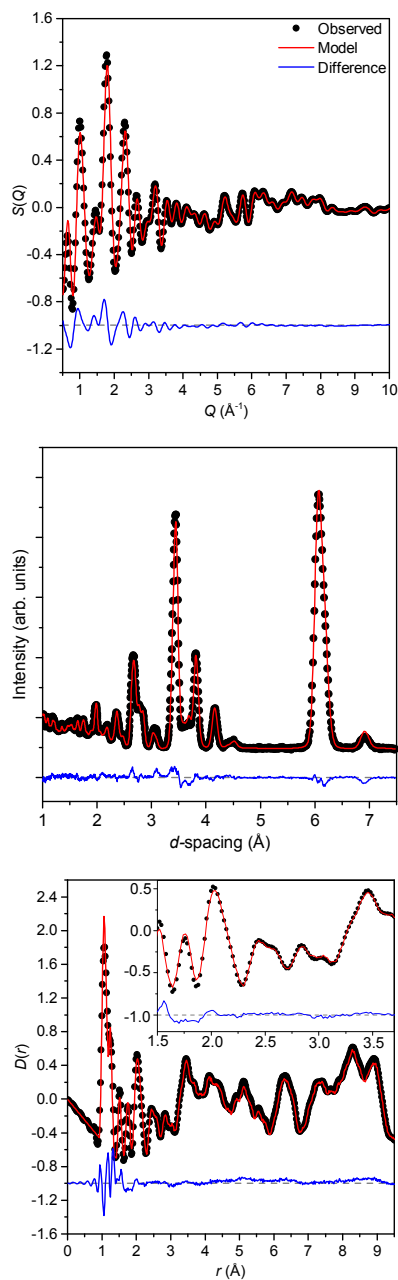

**Figure S7:** Experimental and fit functions  $D(r)$ ,  $S(Q)$ , and  $I(t)$  for a 150 K model

## 9 O–Mn–O bond angles

We report in the main text of the paper that on RMC refinement the O–Mn–O bond angles in both phases merely broaden slightly from their average values. This is shown in figure S8 below:

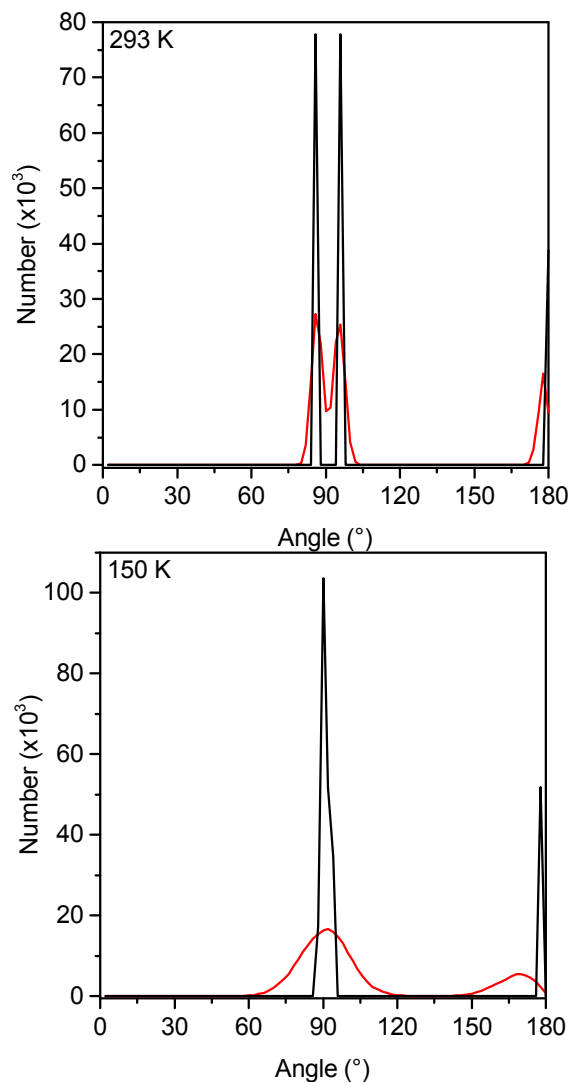

**Figure S8:** The initial (black) and final (red) distributions of the O–Mn–O angles of the  $\text{MnO}_6$  octahedra at 293 K (top) and 150 K (bottom).
